# Supplementary material for: Photo-induced structural changes in two crystal forms with different numbers of independent molecules
Source: Royal Society of Chemistry journal article supplement (doi:10.1039/c0ce00795a), 2011-01-01
Supplement: c0ce00795a.pdf [file c0ce00795a.pdf]

**Table 1S.** Selected crystal data for the structures not included in Table 2.

|                                                                             | 0.0%P ( <b>1a</b> )                                   | 15.0%P ( <b>1a</b> )                                  | 28.6%P ( <b>1a</b> )                                  | 55.6%P ( <b>1a</b> )                                  | 79.9%P ( <b>1a</b> )                                  |
|-----------------------------------------------------------------------------|-------------------------------------------------------|-------------------------------------------------------|-------------------------------------------------------|-------------------------------------------------------|-------------------------------------------------------|
| Chemical formula                                                            | C <sub>33</sub> H <sub>39</sub> NO <sub>4</sub>       |
| Formula weight                                                              | 513.65                                                | 513.65                                                | 513.65                                                | 513.65                                                | 513.65                                                |
| Crystal system                                                              | Orthorhombic                                          | Orthorhombic                                          | Orthorhombic                                          | Orthorhombic                                          | Orthorhombic                                          |
| Space group                                                                 | <i>P</i> 2 <sub>1</sub> 2 <sub>1</sub> 2 <sub>1</sub> |
| <i>a</i> /Å                                                                 | 9.375 (2)                                             | 9.3750 (15)                                           | 9.382 (2)                                             | 9.3702 (13)                                           | 9.3006 (12)                                           |
| <i>b</i> /Å                                                                 | 10.734 (3)                                            | 10.7698 (19)                                          | 10.864 (3)                                            | 11.016 (2)                                            | 11.3515 (16)                                          |
| <i>c</i> /Å                                                                 | 29.950 (6)                                            | 29.857 (4)                                            | 29.571 (7)                                            | 29.134 (5)                                            | 28.334 (4)                                            |
| <i>V</i> /Å <sup>3</sup>                                                    | 3013.9 (12)                                           | 3014.6 (8)                                            | 3014.1 (13)                                           | 3007.3 (9)                                            | 2991.4 (7)                                            |
| <i>Z</i>                                                                    | 4                                                     | 4                                                     | 4                                                     | 4                                                     | 4                                                     |
| <i>D<sub>x</sub></i> /Mg m <sup>-3</sup>                                    | 1.132                                                 | 1.132                                                 | 1.132                                                 | 1.135                                                 | 1.141                                                 |
| $\mu$ /mm <sup>-1</sup>                                                     | 0.07                                                  | 0.07                                                  | 0.07                                                  | 0.07                                                  | 0.07                                                  |
| T/K                                                                         | 299(2)                                                | 299(2)                                                | 299(2)                                                | 299(2)                                                | 299(2)                                                |
| Relections collected                                                        | 14678                                                 | 14671                                                 | 14682                                                 | 14678                                                 | 14608                                                 |
| Reflections independent                                                     | 3010                                                  | 3006                                                  | 2994                                                  | 2990                                                  | 2979                                                  |
| <i>R</i> <sub>int</sub>                                                     | 0.038                                                 | 0.038                                                 | 0.071                                                 | 0.077                                                 | 0.056                                                 |
| <i>R</i> , <i>wR</i> ( <i>F</i> <sup>2</sup> > 2σ( <i>F</i> <sup>2</sup> )) | 0.055, 0.156                                          | 0.073, 0.217                                          | 0.087, 0.266                                          | 0.101, 0.316                                          | 0.082, 0.243                                          |
| $\Delta\rho_{\max}$ , $\Delta\rho_{\min}$ /e Å <sup>-3</sup>                | 0.19, -0.20                                           | 0.21, -0.26                                           | 0.20, -0.20                                           | 0.17, -0.18                                           | 0.18, -0.15                                           |

  

|                                                                             | 81.2%P ( <b>1a</b> )                                  | 87.4%P ( <b>1a</b> )                                  | 100.0%P ( <b>1a</b> )                                 |
|-----------------------------------------------------------------------------|-------------------------------------------------------|-------------------------------------------------------|-------------------------------------------------------|
| Chemical formula                                                            | C <sub>33</sub> H <sub>39</sub> NO <sub>4</sub>       | C <sub>33</sub> H <sub>39</sub> NO <sub>4</sub>       | C <sub>33</sub> H <sub>39</sub> NO <sub>4</sub>       |
| Formula weight                                                              | 513.65                                                | 513.65                                                | 513.65                                                |
| Crystal system                                                              | Orthorhombic                                          | Orthorhombic                                          | Orthorhombic                                          |
| Space group                                                                 | <i>P</i> 2 <sub>1</sub> 2 <sub>1</sub> 2 <sub>1</sub> | <i>P</i> 2 <sub>1</sub> 2 <sub>1</sub> 2 <sub>1</sub> | <i>P</i> 2 <sub>1</sub> 2 <sub>1</sub> 2 <sub>1</sub> |
| <i>a</i> /Å                                                                 | 9.2818 (15)                                           | 9.2671 (14)                                           | 9.2509 (16)                                           |
| <i>b</i> /Å                                                                 | 11.418 (2)                                            | 11.4608 (18)                                          | 11.481 (2)                                            |
| <i>c</i> /Å                                                                 | 28.183 (5)                                            | 28.078 (4)                                            | 28.074 (5)                                            |
| <i>V</i> /Å <sup>3</sup>                                                    | 2986.8 (9)                                            | 2982.1 (8)                                            | 2981.7 (9)                                            |
| <i>Z</i>                                                                    | 4                                                     | 4                                                     | 4                                                     |
| <i>D<sub>x</sub></i> /Mg m <sup>-3</sup>                                    | 1.142                                                 | 1.144                                                 | 1.144                                                 |
| $\mu$ /mm <sup>-1</sup>                                                     | 0.07                                                  | 0.07                                                  | 0.07                                                  |
| T/K                                                                         | 299(2)                                                | 299(2)                                                | 299(2)                                                |
| Relections collected                                                        | 14591                                                 | 14559                                                 | 14562                                                 |
| Reflections independent                                                     | 2968                                                  | 2960                                                  | 2959                                                  |
| <i>R</i> <sub>int</sub>                                                     | 0.053                                                 | 0.052                                                 | 0.049                                                 |
| <i>R</i> , <i>wR</i> ( <i>F</i> <sup>2</sup> > 2σ( <i>F</i> <sup>2</sup> )) | 0.080, 0.246                                          | 0.077, 0.226                                          | 0.067, 0.178                                          |
| $\Delta\rho_{\max}$ , $\Delta\rho_{\min}$ /e Å <sup>-3</sup>                | 0.20, -0.21                                           | 0.17, -0.20                                           | 0.18, -0.14                                           |

  

|                                                                             | 15.9%P for A<br>17.4%P for B<br>( <b>1b</b> )   | 20.4%P for A<br>30.6%P for B<br>( <b>1b</b> )   | 25.5%P for A<br>54.9%P for B<br>( <b>1b</b> )   |
|-----------------------------------------------------------------------------|-------------------------------------------------|-------------------------------------------------|-------------------------------------------------|
| Chemical formula                                                            | C <sub>33</sub> H <sub>39</sub> NO <sub>4</sub> | C <sub>33</sub> H <sub>39</sub> NO <sub>4</sub> | C <sub>33</sub> H <sub>39</sub> NO <sub>4</sub> |
| Formula weight                                                              | 513.65                                          | 513.65                                          | 513.65                                          |
| Crystal system                                                              | Orthorhombic                                    | Orthorhombic                                    | Orthorhombic                                    |
| Space group                                                                 | <i>P</i> na2 <sub>1</sub>                       | <i>P</i> na2 <sub>1</sub>                       | <i>P</i> na2 <sub>1</sub>                       |
| <i>a</i> /Å                                                                 | 22.093 (4)                                      | 22.142 (4)                                      | 22.179 (4)                                      |
| <i>b</i> /Å                                                                 | 9.3747 (19)                                     | 9.3891 (17)                                     | 9.3739 (17)                                     |
| <i>c</i> /Å                                                                 | 28.939 (6)                                      | 28.954 (5)                                      | 28.978 (6)                                      |
| <i>V</i> /Å <sup>3</sup>                                                    | 5994 (2)                                        | 6019.3 (19)                                     | 6025 (2)                                        |
| <i>Z</i>                                                                    | 8                                               | 8                                               | 8                                               |
| <i>D<sub>x</sub></i> /Mg m <sup>-3</sup>                                    | 1.138                                           | 1.134                                           | 1.133                                           |
| $\mu$ /mm <sup>-1</sup>                                                     | 0.07                                            | 0.07                                            | 0.07                                            |
| T/K                                                                         | 299(2)                                          | 299(2)                                          | 299(2)                                          |
| Relections collected                                                        | 27901                                           | 28026                                           | 28066                                           |
| Reflections independent                                                     | 5369                                            | 5390                                            | 5393                                            |
| <i>R</i> <sub>int</sub>                                                     | 0.049                                           | 0.052                                           | 0.054                                           |
| <i>R</i> , <i>wR</i> ( <i>F</i> <sup>2</sup> > 2σ( <i>F</i> <sup>2</sup> )) | 0.076, 0.223                                    | 0.077, 0.229                                    | 0.088, 0.272                                    |
| $\Delta\rho_{\max}$ , $\Delta\rho_{\min}$ /e Å <sup>-3</sup>                | 0.18, -0.27                                     | 0.18, -0.22                                     | 0.19, -0.20                                     |
